# Supplementary material
Source: PubMed Central journal article supplement (PMC5411266)
Supplement: NIHMS852678-supplement-1.pdf [file NIHMS852678-supplement-1.pdf]

## **Supplementary Material**

### **Unveiling HIV dynamics among transgender women: a respondent driven sampling study in Rio de Janeiro, Brazil**

Grinsztejn B\*, Jalil EM\*, Monteiro L, Velasque L, Moreira RI, Garcia ACF, Castro CV, Krüger A, Luz PM, Liu AY, McFarland W, Buchbinder S, Veloso VG, Wilson EC

## Definitions of gender identities

We used four categories for gender identity (*travesti*, woman, transsexual woman, and other definitions) and included all of these categories within the umbrella term ‘transgender women’ (or ‘transwomen’ as a short form).

In Brazil, the term ‘*travesti*’ mostly refers to people who were assigned a male sex at birth, have feminine gender expression, but do not identify as women, and generally do not wish to undergo feminizing vaginoplasty<sup>1</sup>. The identity of transsexual woman in Brazil often refers to people who identify as women and usually want surgery. Both *travestis* and transsexual women are considered transgender people on the feminine spectrum who were assigned a male sex at birth<sup>2</sup>.

Figure S1 - Procedures – *Transcender* Study

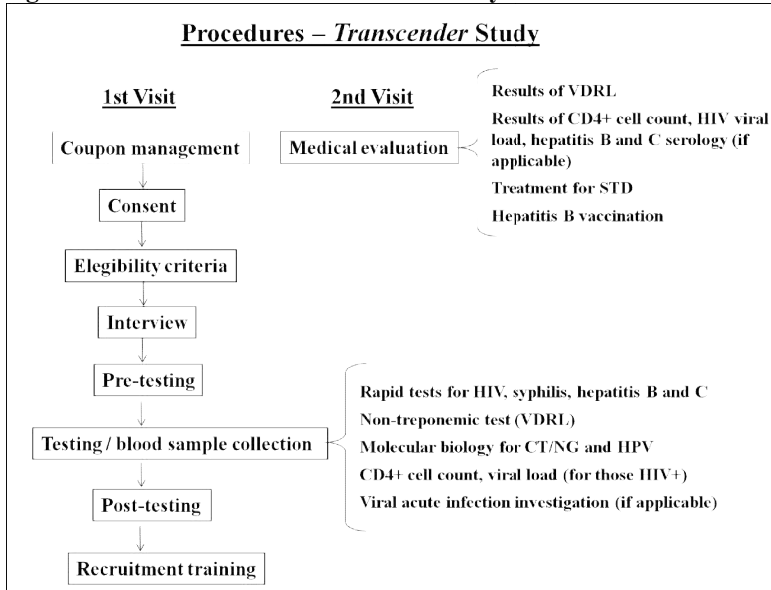

## Comparison between known HIV positive transwomen and newly diagnosed as HIV positive transwomen

We used chi-square tests to compare the known HIV positive group with the newly diagnosed and found these groups to be significantly different from each other (Table S1).

Compared to those with a known HIV positive serostatus, transwomen newly diagnosed with HIV were more likely to be younger (age 18-24) (31.1% newly diagnosed vs. 4% known HIV positive;  $p < 0.0001$ ), of mixed race (59.6% newly diagnosed vs. 33.2% known HIV positive;  $p < 0.0001$ ), of a gender identity other than “woman” (94.7% newly diagnosed vs. 70.2% known HIV positive;  $p < 0.0001$ ), on hormones (45.1% newly diagnosed vs. 34.6% known HIV positive;  $p < 0.0001$ ), and were less likely to report using soft tissue fillers (46.7% newly diagnosed vs. 54% known HIV positive;  $p < 0.0001$ ) (Table 3). Significantly more physical violence (76% newly diagnosed vs. 71.4% known HIV positive;  $p = 0.0417$ ) and binge drinking (87.4% newly diagnosed vs. 64.9% known HIV positive;  $p < 0.0001$ ) was reported among those newly diagnosed with HIV compared to those who knew they were living with HIV. A significantly higher proportion of those newly diagnosed also reported currently doing sex work compared to those who knew they were living with HIV (88.4% newly diagnosed vs. 55.4% known HIV positive;  $p < 0.0001$ ). The median number of sexual partners in the last 6 months was higher among transwomen newly diagnosed with HIV compared to those with a previously known HIV positive status (399 [IQR 159-576] newly diagnosed vs. 4 [IQR 3-100] known HIV positive).

Median HIV VL and CD4+ cell counts of transwomen newly diagnosed with HIV were 4.0 log<sub>10</sub> copies per mL (IQR 3.7-4.3) and 832 cells per  $\mu$ L (IQR 568-942). Among those with a known HIV positive serostatus, 83.5% (95% CI 59.6-100.0) were on combined antiretroviral therapy (cART), and 71.3% had a CD4+ cell count higher than 500 cells per  $\mu$ L (95% CI 47.3-95.4). Among those on cART, 49.0% (95% CI 8.0-90.0) had an undetectable VL.

**Table S1: Weighted prevalences among transwomen, according to HIV status, in Rio de Janeiro, Brazil, 2015-2016.**

| Characteristic                                             | Previous HIV-positive<br>(101)<br>% | Newly diagnosed HIV-infection<br>(40)<br>% | p-value |
|------------------------------------------------------------|-------------------------------------|--------------------------------------------|---------|
| Age                                                        |                                     |                                            | <0.0001 |
| 18-24                                                      | 4.0                                 | 31.1                                       |         |
| 25-35                                                      | 49.6                                | 55.3                                       |         |
| 36+                                                        | 46.4                                | 13.6                                       |         |
| Self-declared race/color                                   |                                     |                                            | <0.0001 |
| White                                                      | 22.8                                | 8.0                                        |         |
| Mixed                                                      | 33.2                                | 59.6                                       |         |
| Black                                                      | 43.7                                | 32.4                                       |         |
| Other                                                      | 0.3                                 | 0.0                                        |         |
| Monthly income (in<br>US\$) <sup>1</sup>                   |                                     |                                            | <0.0001 |
| ≤130.00                                                    | 58.4                                | 41.1                                       |         |
| 131.00 – 260.00                                            | 30.3                                | 46.6                                       |         |
| >260.00                                                    | 11.3                                | 12.3                                       |         |
| Years of education                                         |                                     |                                            | <0.0001 |
| <4                                                         | 10.9                                | 14.2                                       |         |
| 4-8                                                        | 30.8                                | 17.2                                       |         |
| 9+                                                         | 58.3                                | 68.6                                       |         |
| Current gender identity                                    |                                     |                                            | <0.0001 |
| Travesti                                                   | 33.0                                | 50.1                                       |         |
| Woman                                                      | 29.8                                | 5.3                                        |         |
| Transsexual woman                                          | 35.2                                | 44.3                                       |         |
| Other definitions                                          | 2.0                                 | 0.3                                        |         |
| Currently taking<br>hormones                               | 34.6                                | 45.1                                       | <0.0001 |
| Ever used soft tissue<br>fillers                           | 54.0                                | 46.7                                       | 0.0034  |
| Age at sexual debut                                        |                                     |                                            | <0.0001 |
| <12                                                        | 45.1                                | 23.2                                       |         |
| 12-18                                                      | 48.7                                | 75.2                                       |         |
| >19                                                        | 6.2                                 | 1.6                                        |         |
| Sex work                                                   |                                     |                                            | <0.0001 |
| No                                                         | 17.7                                | 2.2                                        |         |
| Currently                                                  | 55.4                                | 88.4                                       |         |
| Ever (not currently)                                       | 26.9                                | 9.4                                        |         |
| Ever suffered physical<br>violence                         | 71.4                                | 76.0                                       | 0.0417  |
| Ever suffered<br>discrimination                            |                                     |                                            | <0.0001 |
| Ever raped                                                 | 67.9                                | 50.9                                       |         |
| Ever drug use                                              | 89.7                                | 77.9                                       | <0.0001 |
| Binge drinking <sup>2</sup>                                | 64.9                                | 87.4                                       | <0.0001 |
| 5+ sex partners in the<br>last 6 mos                       | 44.5                                | 94.8                                       | <0.0001 |
| Had condomless anal<br>intercourse with last 3<br>partners | 48.6                                | 49.5                                       | 0.7159  |

<sup>1</sup> US\$1.00=BRL3.85; <sup>2</sup> Defined as six or more alcohol drinks on any occasion.

Figure S2 - Pattern of recruitment of transwomen according to HIV test result in Rio de Janeiro, 2015-2016.

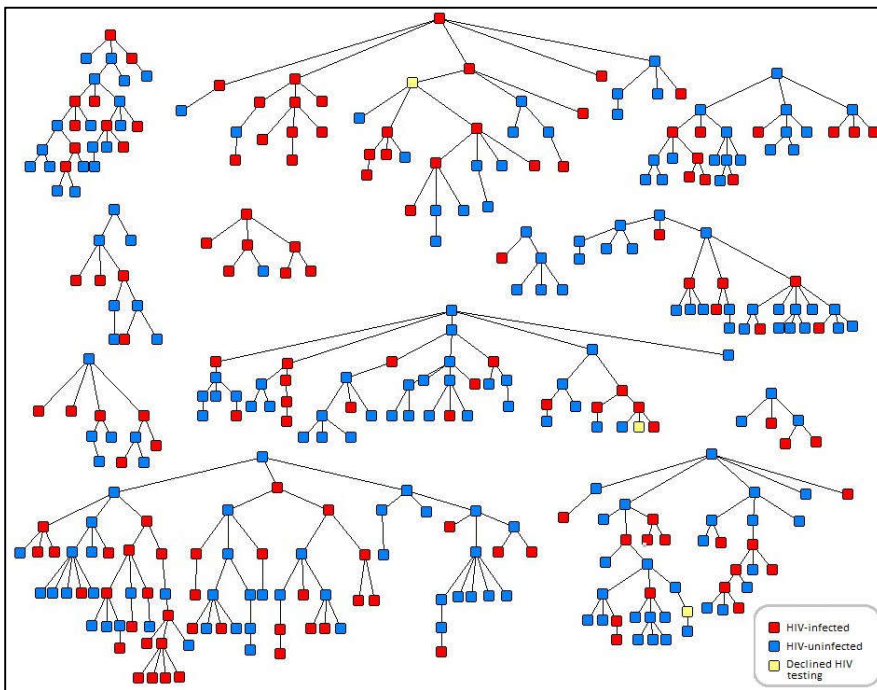

## References

1. Kulick D. Travesti: prostituição, sexo, gênero e cultura no Brasil. Rio de Janeiro: Fiozacruz, 2008. 280 p.
2. Krüger A, Silva RP. Aspectos fisiológicos e a hormonioterapia para mulheres trans. Ponta Grossa: UEPG, 2015. 55 p.
